# Supplementary material for: Apgar score and risk of autism
Source: Springer Nature journal article supplement (doi:10.1007/s10654-018-0445-1), 2018-10-05
Supplement: MOESM1 [file 16176278]

**Supplementary Table 1. Risk of AD by Apgar score**

| Disorder                   | Apgar score          | Prevalence cases/number of children (%) | All Births, RR (95% CI)           |                      |                      |                      |
|----------------------------|----------------------|-----------------------------------------|-----------------------------------|----------------------|----------------------|----------------------|
|                            |                      |                                         | Model 1 <sup>a</sup>              | Model 2 <sup>b</sup> | Model 3 <sup>c</sup> | Model 4 <sup>d</sup> |
| <b>AD</b><br>(N=5,319,642) |                      |                                         |                                   |                      |                      |                      |
|                            | <b>1-3</b>           | 46/8,385<br>(0.55)                      | 2.54 (1.91-3.38)                  | 2.44 (1.84-3.25)     | 2.20 (1.65-2.93)     | 1.88 (1.41-2.51)     |
|                            | <b>4-6</b>           | 161/38,990<br>(0.41)                    | 2.00 (1.72-2.33)                  | 1.87 (1.61-2.18)     | 1.72 (1.47-2.01)     | 1.54 (1.32-1.81)     |
|                            | <b>7-10</b><br>(ref) | 11,336/5,272,267<br>(0.21)              | 1.00                              | 1.00                 | 1.00                 | 1.00                 |
|                            |                      |                                         | Singleton Births only RR (95% CI) |                      |                      |                      |
| <b>AD</b><br>(N=5,175,194) |                      |                                         |                                   |                      |                      |                      |
|                            | <b>1-3</b>           | 43/7,727<br>(0.56)                      | 2.60 (1.93-3.49)                  | 2.57 (1.92-3.46)     | 2.24 (1.66-3.01)     | 1.89 (1.41-2.55)     |
|                            | <b>4-6</b>           | 150/ 35973<br>(0.41)                    | 2.04 (1.74-2.39)                  | 2.03 (1.73-2.38)     | 1.76 (1.50-2.06)     | 1.58 (1.34-1.85)     |
|                            | <b>7-10</b><br>(ref) | 10,941/5,123,772<br>(0.21)              | 1.00                              | 1.00                 | 1.00                 | 1.00                 |

Abbreviations: ASD: Autism Spectrum Disorder; AD: Autistic Disorder; N: Number; RR: Relative Risk; 95%CI: 95% confidence intervals

The estimates are RR (95% CI)

a. Adjusted for site and birth year

b. Adjusted for site, birth year, and maternal and paternal age, sex

c. Adjusted for site, birth year, and maternal and paternal age, sex, and gestational age

d. Adjusted for site, birth year, and maternal and paternal age, sex, gestational age, and birth weight

**Supplementary Table 2.** Risk of AD by Apgar score stratified by sex

| Disorder                    | Apgar score           | Prevalence cases/<br>number of<br>children (%) | Females, RR (95% CI) |                  |                  |
|-----------------------------|-----------------------|------------------------------------------------|----------------------|------------------|------------------|
|                             |                       |                                                | Model 1              | Model 2          | Model 3          |
| <b>AD<br/>(N=2,596,800)</b> |                       |                                                |                      |                  |                  |
|                             | <b>1-3</b>            | 15/3,814<br>(0.39)                             | 3.74 (2.29-6.11)     | 3.20 (1.96-5.23) | 2.62 (1.59-4.32) |
|                             | <b>4-6</b>            | 41/16,755<br>(0.24)                            | 2.70 (2.01-3.63)     | 2.35 (1.75-3.16) | 2.01 (1.49-2.73) |
|                             | <b>7-10<br/>(ref)</b> | 2,517/2,592,851<br>(0.10)                      | 1.00                 | 1.00             | 1.00             |
|                             |                       |                                                | Males, RR (95%CI)    |                  |                  |
| <b>AD<br/>(N=2,730,942)</b> |                       |                                                |                      |                  |                  |
|                             | <b>1-3</b>            | 31/4,571<br>(0.68)                             | 2.10 (1.48-2.98)     | 1.90 (1.34-2.70) | 1.65 (1.16-2.35) |
|                             | <b>4-6</b>            | 120/22,235<br>(0.54)                           | 1.69 (1.41-2.02)     | 1.57 (1.31-1.88) | 1.43 (1.19-1.71) |
|                             | <b>7-10<br/>(ref)</b> | 8,819/2,699,929<br>(0.33)                      | 1.00                 | 1.00             | 1.00             |

Abbreviations: ASD: Autism Spectrum Disorder; AD: Autistic Disorder; N: Number; RR: Relative Risk; 95%CI: 95% confidence intervals

The estimates are RR (95%CI)

a. Adjusted for site and birth year

b. Adjusted for site, birth year, and maternal and paternal age, and gestational age

c. Adjusted for site, birth year, and maternal and paternal age, gestational age, and birth weight

**Table 3.** Risk of AD by Apgar score stratified by gestational age

| Disorder                        | Apgar score       | Prevalence cases/number of children (%) | ≤36 weeks, RR (95%CI) |                  |                  |
|---------------------------------|-------------------|-----------------------------------------|-----------------------|------------------|------------------|
|                                 |                   |                                         | Model 1               | Model 2          | Model 3          |
| <b>AD (N=319,284)</b>           |                   |                                         |                       |                  |                  |
|                                 | <b>1-3</b>        | 21/2,494 (0.84)                         | 2.56 (1.67-3.95)      | 2.48 (1.61-3.82) | 1.80 (1.16-2.80) |
|                                 | <b>4-6</b>        | 75/10,168 (0.74)                        | 2.49 (1.97-3.14)      | 2.41 (1.91-3.04) | 1.88 (1.47-2.39) |
|                                 | <b>7-10 (ref)</b> | 938/305,201 (0.31)                      | 1.00                  | 1.00             | 1.00             |
| <b>37-40 weeks, RR (95% CI)</b> |                   |                                         |                       |                  |                  |
| <b>AD (N=3,629,958)</b>         |                   |                                         |                       |                  |                  |
|                                 | <b>1-3</b>        | 14/3,961 (0.35)                         | 1.77 (1.07-2.94)      | 1.71 (1.03-2.84) | 1.65 (0.99-2.73) |
|                                 | <b>4-6</b>        | 57/18,710 (0.30)                        | 1.52 (1.18-1.97)      | 1.43 (1.11-1.84) | 1.38 (1.07-1.79) |
|                                 | <b>7-10 (ref)</b> | 7,562/3,602,491 (0.21)                  | 1.00                  | 1.00             | 1.00             |
| <b>≥41 weeks, RR (95% CI)</b>   |                   |                                         |                       |                  |                  |
| <b>AD (N=1,378,490)</b>         |                   |                                         |                       |                  |                  |
|                                 | <b>1-3</b>        | 11/1,930 (0.57)                         | 2.62 (1.45-4.72)      | 2.57 (1.42-4.63) | 2.53 (1.40-4.56) |
|                                 | <b>4-6</b>        | 29/10,112 (0.29)                        | 1.36 (0.95-1.97)      | 1.27 (0.88-1.83) | 1.26 (0.87-1.82) |
|                                 | <b>7-10 (ref)</b> | 2,836/1,364,575 (0.21)                  | 1.00                  | 1.00             | 1.00             |

Abbreviations: ASD: Autism Spectrum Disorder; AD: Autistic Disorder; N: Number; RR: Relative Risk; 95%CI: 95% confidence intervals

The estimates are RR (95%CI)

a. Adjusted for site and birth year

b. Adjusted for site, birth year, and maternal and paternal age, and sex

c. Adjusted for site, birth year, and maternal and paternal age, sex, and birth weight
